# Supplementary material for: Chemical and structural investigation of the paroxetine-human serotonin transporter complex
Source: eLife journal article supplement (doi:10.7554/elife.56427), 2020-07-03
Supplement: supp [file elife-56427-supp-v1.zip]

Archive with 7 entries (7 files):
- elife_poa_e56427_Figure_4_figure_supplement_1.pdf
- elife_poa_e56427_Figure_4_figure_supplement_2.pdf
- elife_poa_e56427_Figure_4_figure_supplement_3.pdf
- elife_poa_e56427_Figure_4_figure_supplement_4.pdf
- elife_poa_e56427_Figure_4_figure_supplement_5.pdf
- elife_poa_e56427_Figure_4_figure_supplement_6.pdf
- elife_poa_e56427_Transparent_Reporting_File.docx
