# Supplementary figures and images for: Chemical and structural investigation of the paroxetine-human serotonin transporter complex
Source: eLife journal article supplement (doi:10.7554/elife.56427), 2020-07-03

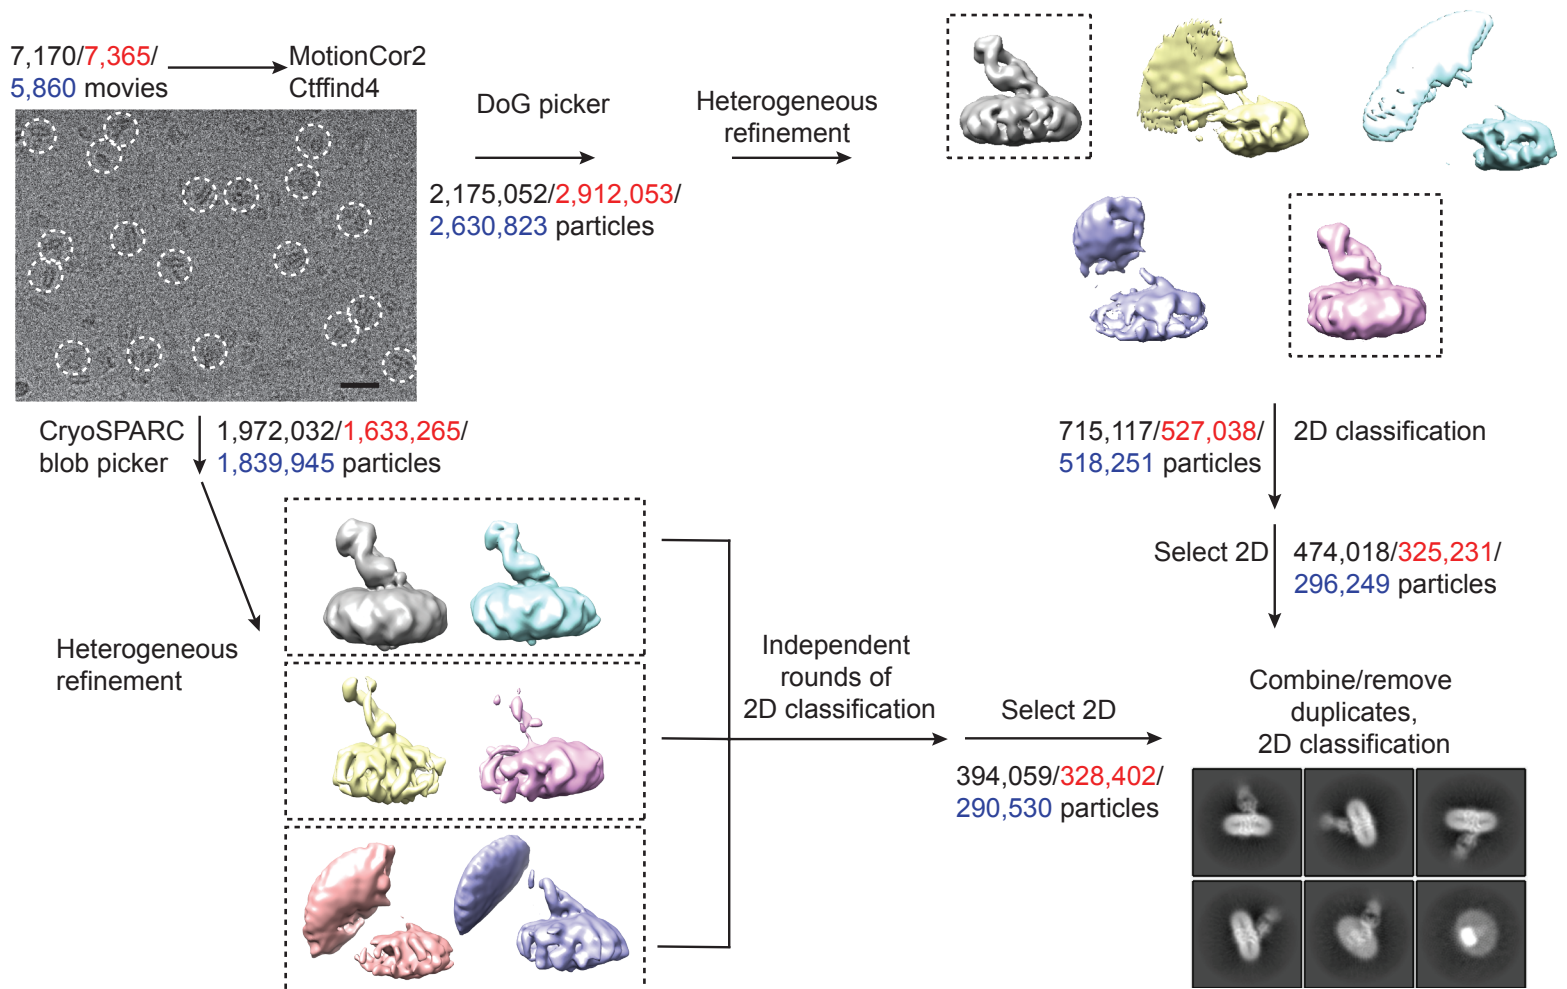

Figure 4 - figure supplement 1

Supplement: supp [file elife-56427-supp-v1.zip › elife_poa_e56427_Figure_4_figure_supplement_1.pdf]

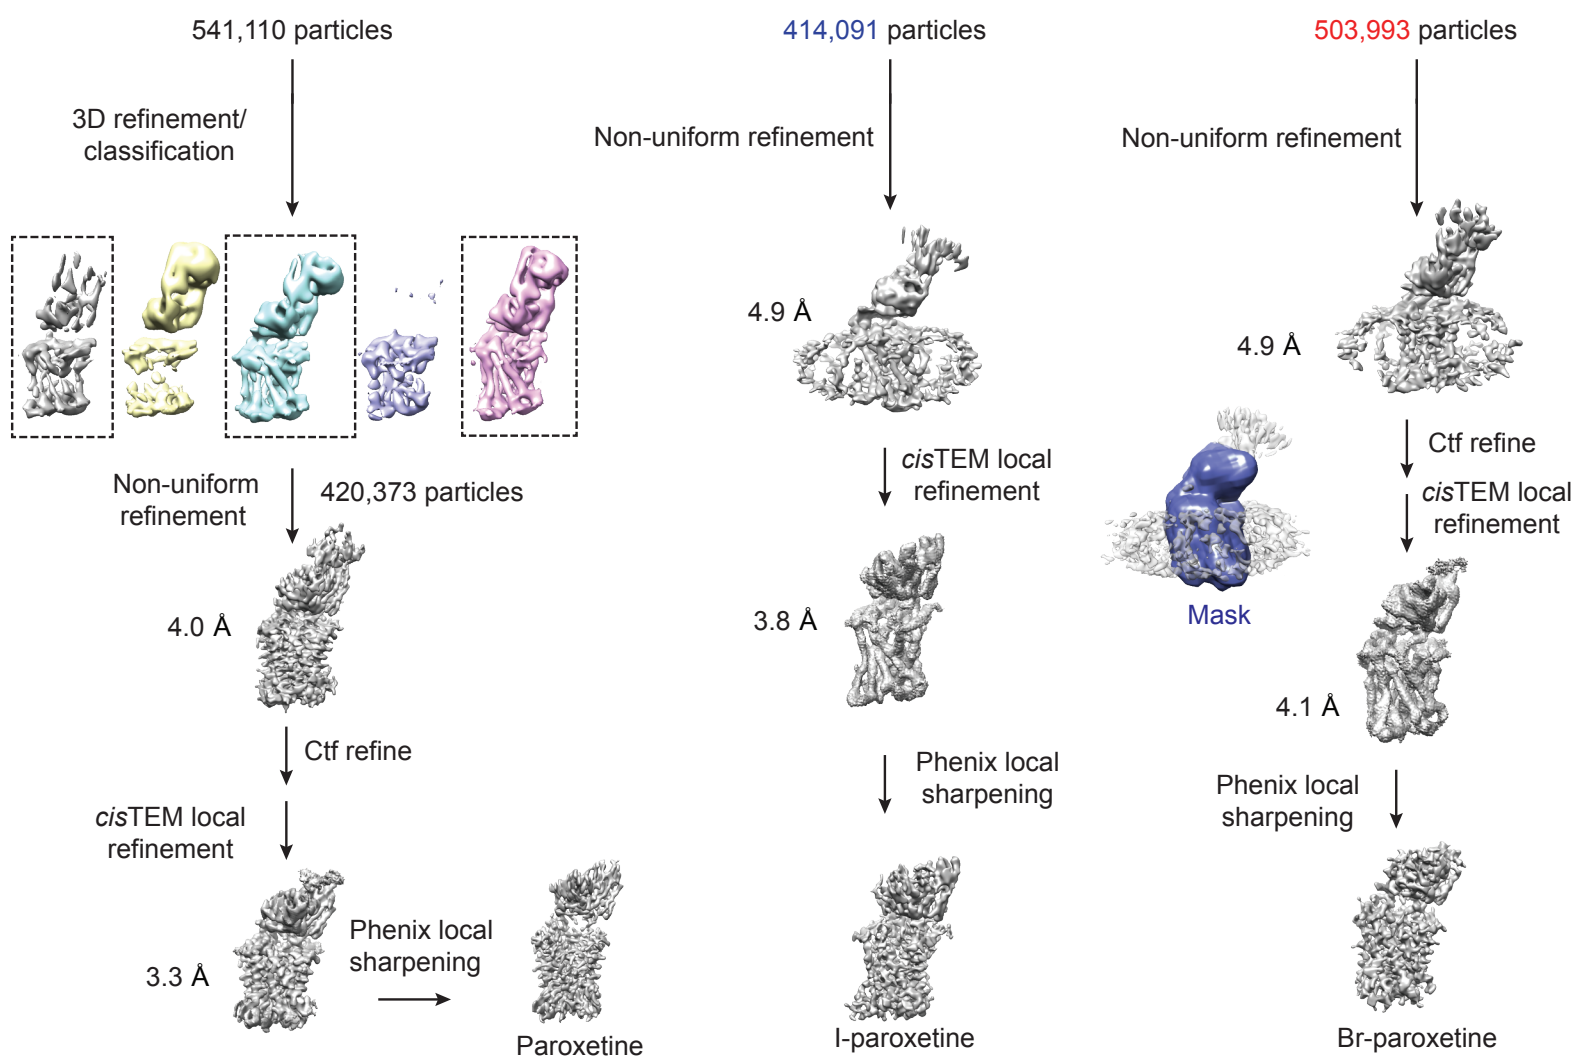

Figure 4 - figure supplement 2

Supplement: supp [file elife-56427-supp-v1.zip › elife_poa_e56427_Figure_4_figure_supplement_2.pdf]

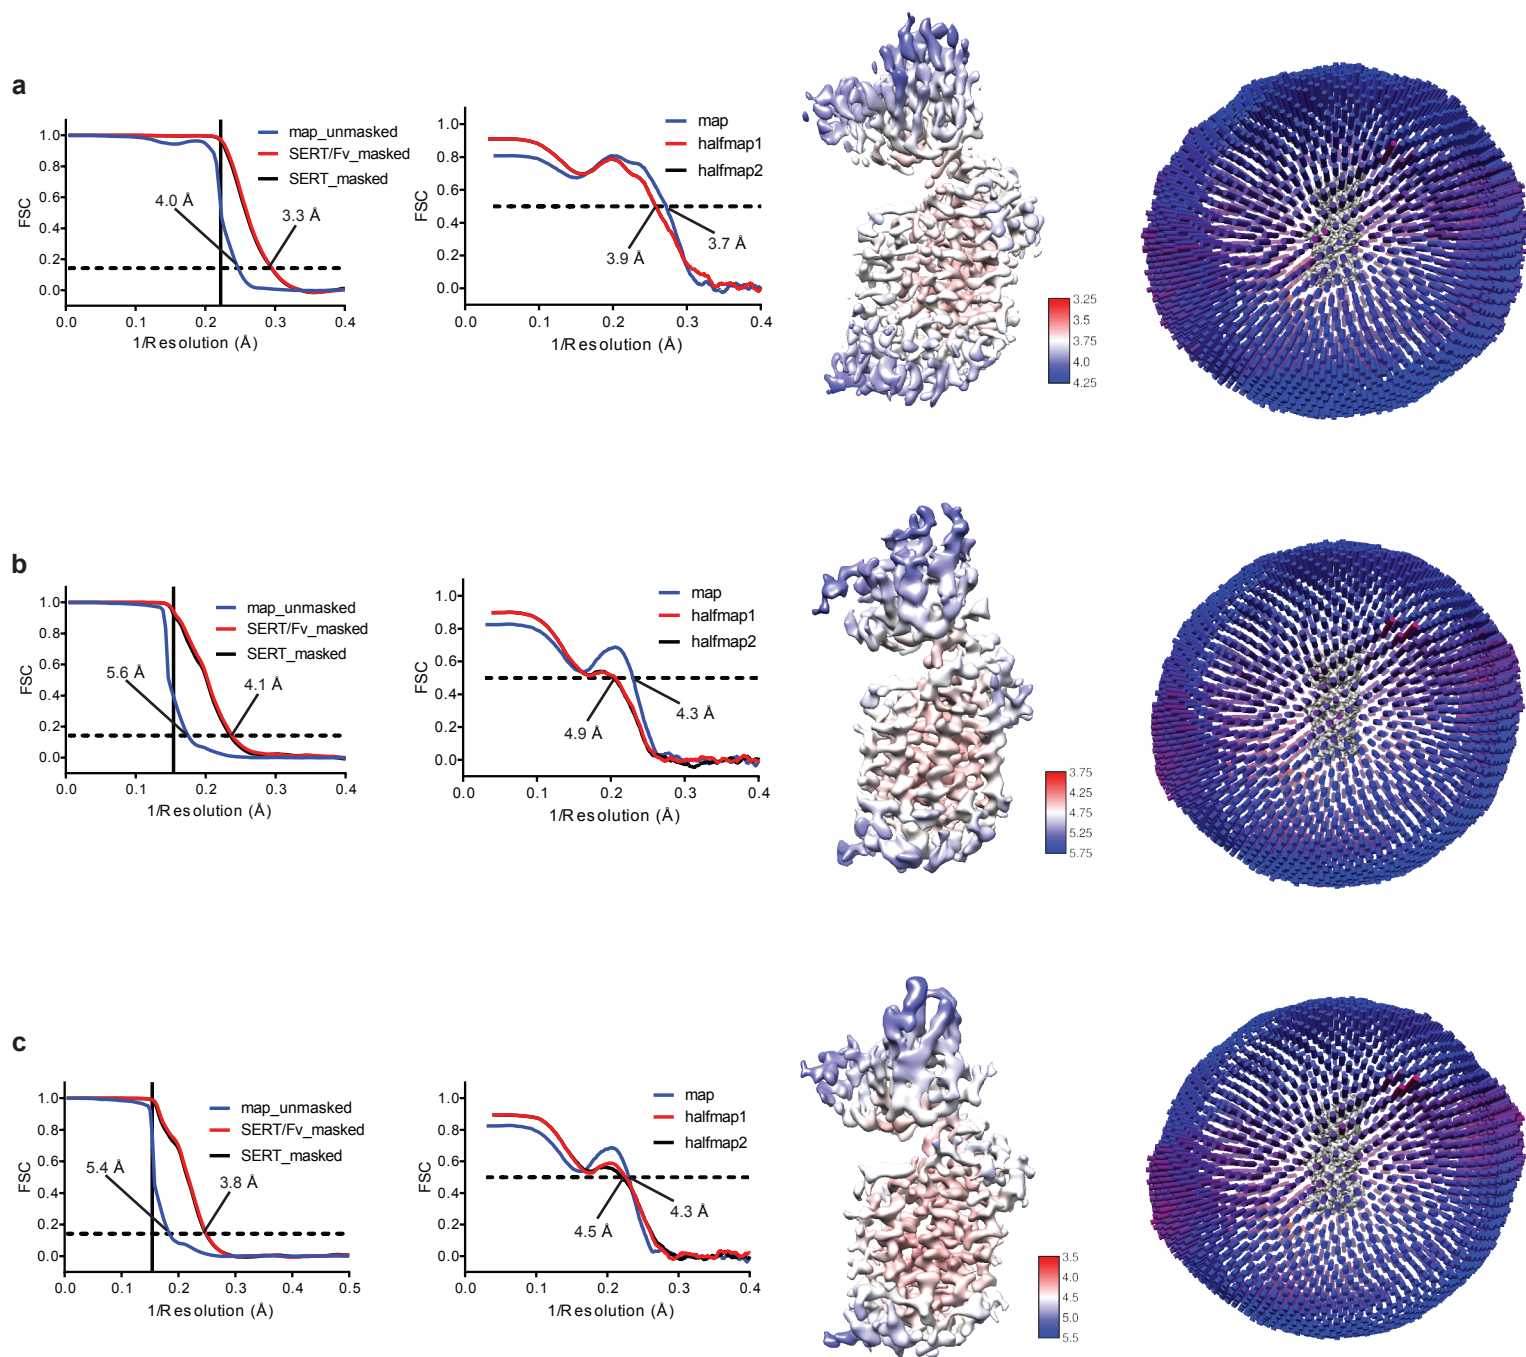

Figure 4 - figure supplement 3

Supplement: supp [file elife-56427-supp-v1.zip › elife_poa_e56427_Figure_4_figure_supplement_3.pdf]

**a**

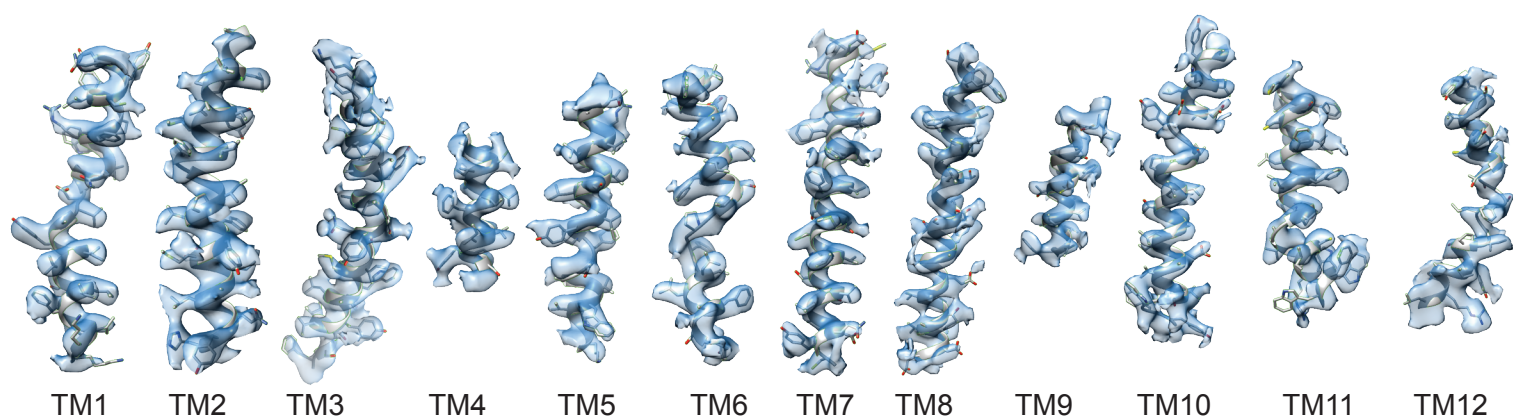

**b**

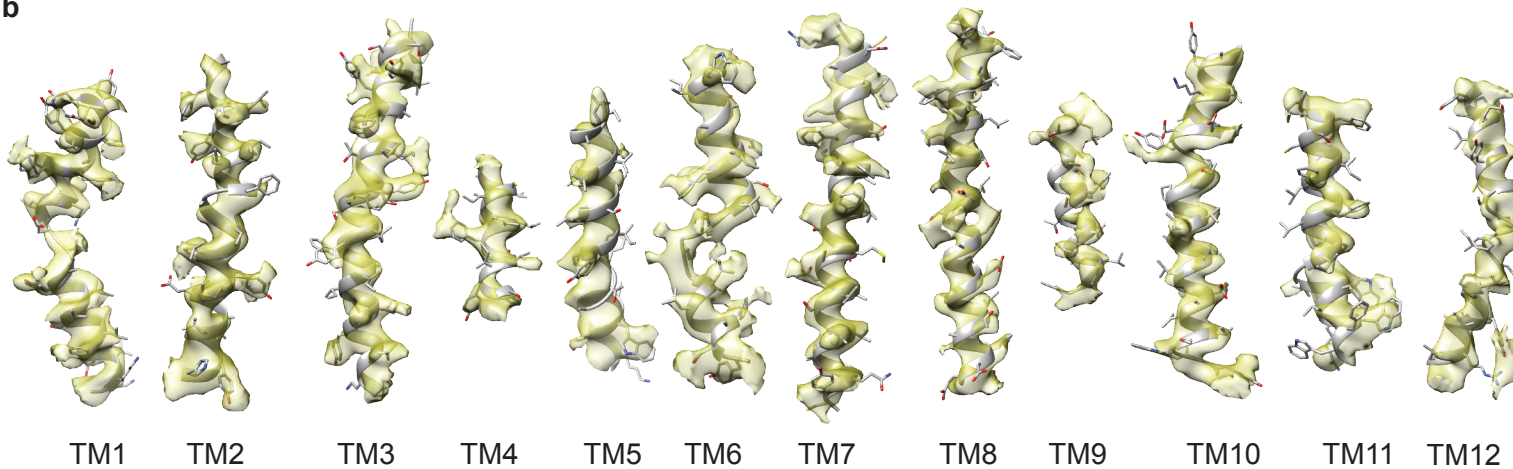

**c**

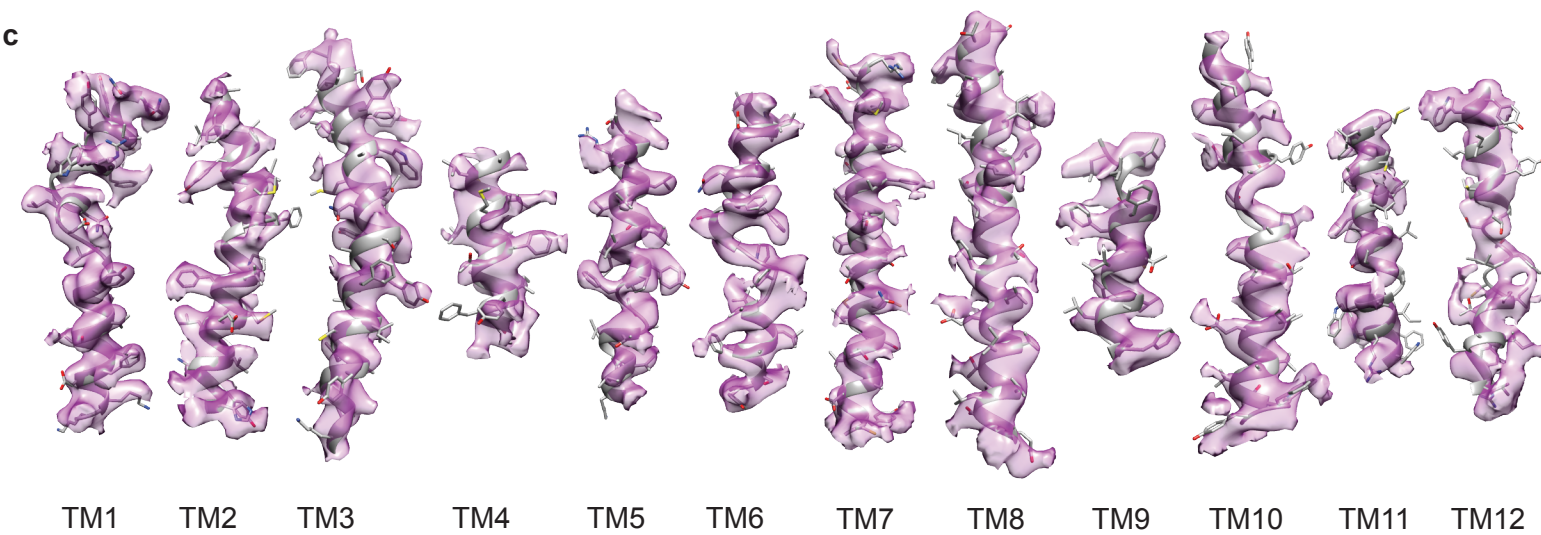

**Figure 4 - figure supplement 4**

Supplement: supp [file elife-56427-supp-v1.zip › elife_poa_e56427_Figure_4_figure_supplement_4.pdf]

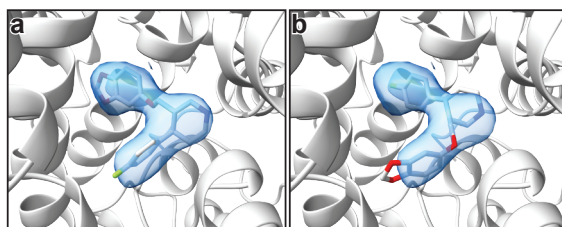

Figure 4 - figure supplement 5

Supplement: supp [file elife-56427-supp-v1.zip › elife_poa_e56427_Figure_4_figure_supplement_5.pdf]

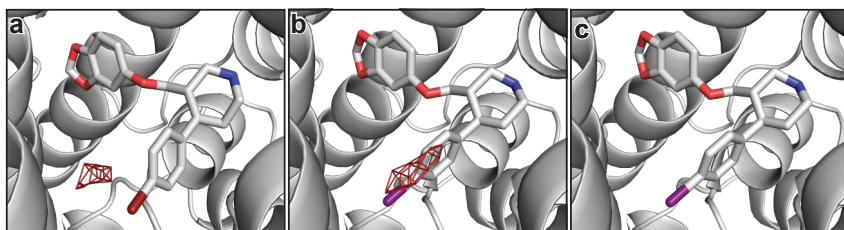

Figure 4 - figure supplement 6

Supplement: supp [file elife-56427-supp-v1.zip › elife_poa_e56427_Figure_4_figure_supplement_6.pdf]
